# Supplementary material for: Direct observation of the layer-dependent electronic structure in phosphorene
Source: Springer Nature journal article supplement (doi:10.1038/nnano.2016.171), 2016-09-16
Supplement: 41565_2017_BFnnano2016171_MOESM4_ESM.pdf [file 41565_2017_BFnnano2016171_MOESM4_ESM.pdf]

## Direct observation of the layer-dependent electronic structure in phosphorene

4 Likai Li, Jonghwan Kim, Chenhao Jin, Guojun Ye, Diana Y. Qiu, Felipe H. da Jornada, Zhiwen  
5 Shi, Long Chen, Zuocheng Zhang, Fangyuan Yang, Kenji Watanabe, Takashi Taniguchi, Wencai  
6 Ren, Steven G. Louie\*, Xianhui Chen\*, Yuanbo Zhang\* and Feng Wang\*  
7

8 \* Email: [fengwang76@berkeley.edu](mailto:fengwang76@berkeley.edu); [zhyb@fudan.edu.cn](mailto:zhyb@fudan.edu.cn); [chenxh@ustc.edu.cn](mailto:chenxh@ustc.edu.cn),  
9 [sglouie@berkeley.edu](mailto:sglouie@berkeley.edu)  
10

11

12

13

14 **S1. Estimation of sample thickness: optical contrast and AFM measurement**

15 We combined optical contrast and atomic force microscopy (AFM) measurements to  
 16 estimate the layer-number of the few-layer black phosphorus (BP) flakes. Accurate thickness  
 17 determination for isolated phosphorene flakes is difficult using AFM due to the different tip-  
 18 surface interaction on phosphorene and SiO<sub>2</sub>/Si wafer. However, the AFM height difference  
 19 between two adjacent flakes of different thickness can yield useful information, since an average  
 20 height increase of 0.5 nm is expected for one additional atomic layer. Indeed, for monolayer  
 21 terraces on a black phosphorus flake, an average AFM height difference was found to be ~ 0.5  
 22 nm, which is consistent with the thickness of monolayer black phosphorus (Figure S1b and S1c).  
 23 Meanwhile, the optical contrast ( $1 - \left(\frac{R_{sample}}{R_{substrate}}\right)$ , where  $R_{sample}$  and  $R_{substrate}$  are the  
 24 reflectance of the sample flake and the Si wafer with 300 nm thermally growth SiO<sub>2</sub> layer,  
 25 respectively) of the red channel of the CCD image shows a difference of ~ 7% (Fig. 1d in the  
 26 main text). We could therefore use such contrast to estimate the layer-number of the few-layer  
 27 phosphorene flakes. Such estimation was later verified by the layer-dependent optical absorption  
 28 resonances, as described in the main text.

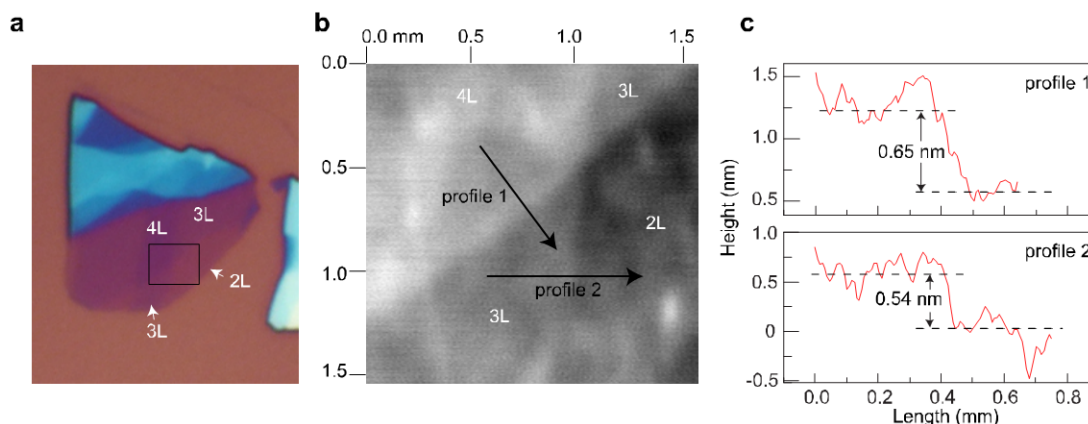

29

30 **Figure S1 | Preliminary estimation of sample thickness.** **a**, Optical image of bilayer, trilayer  
 31 and tetralayer phosphorene samples on Si wafer with 300 nm thermally growth SiO<sub>2</sub> layer. The  
 32 image was recorded with a CCD camera attached to an optical microscope. **b**, AFM image of the  
 33 sample area marked in **a**. **c**, AFM height profiles measured along line-cuts shown in **b**. An  
 34 average height difference of ~ 0.5 nm is obtained on monolayer terraces.

35

36

37

38

39 **S2. Obtaining absorption resonances from the reflectance spectra**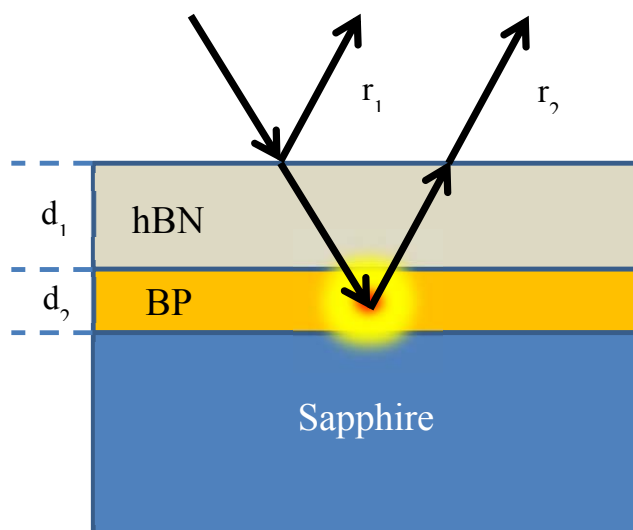

40

41 **Figure S2. Illustration of light reflection from the hBN-BP-sapphire system.** The normal  
42 incident light is drawn obliquely for visual clarity.

43

44 The phosphorene samples are encapsulated between sapphire substrate and hexagonal  
45 boron nitride (hBN). The difference spectrum  $\Delta R/R$  from phosphorene is related to its complex  
46 dielectric constant through Fresnel equation with known refractive indices of hBN and sapphire  
47 and the hBN thickness.

48 In the visible and near-infrared spectral region, the refractive index of hBN and sapphire  
49 can be approximated as a constant with  $n_{BN} = n_{Sapphire} = 1.75$  (denoted as  $n_1$ ). The hBN  
50 thickness ( $d_1$ ) is approximately 15 nm in our devices. We denote the phosphorene dielectric  
51 constant and effective thickness as  $\epsilon_2(\omega)$  and  $d_2$ , respectively.

52 Optical reflection changes from atomically thin layers such as phosphorene can be treated  
53 as a small perturbation, and it has the form of  $\frac{\Delta R}{R} = -Re[\sigma \cdot c_l^2 / c_r]$  (Refs. 1,2). , where  $c_l$  is the  
54 local field factor at the sample,  $c_r$  is the reflection coefficient, and  $\sigma = \frac{\omega d_2}{i} (\epsilon_2 - 1)$  is the two-  
55 dimensional optical conductivity of black phosphorous. The reflection is dominated by the hBN-  
56 air interface  $r_1$  as shown in Fig. S2, therefore  $c_r = r_1 = \frac{n_0 - n_1}{n_0 + n_1}$ . The local electric field at sample  
57 has the form  $c_l = t_1 e^{i\varphi}$ . Here  $t_1 = \frac{2n_0}{n_0 + n_1}$  is the transmission from air to hBN, and  $\varphi = 2\pi \frac{n_1 \omega d_1}{c_0}$   
58 is the phase change of light propagating through the hBN layer. The final result is.

$$\frac{\Delta R}{R} = \frac{4\omega d_2}{n_1^2 - 1} \text{Im}[(\epsilon_2 - 1)e^{i2\varphi}] = \frac{4\omega d_2}{n_1^2 - 1} \text{Im}\left[(\epsilon_2 - 1)e^{i\frac{4\pi\omega d_1}{c_0}}\right] \quad (\text{S1})$$

59 If the hBN thickness is negligible (*i.e.*  $e^{i\varphi} = 1$ ), the reflectance contrast is proportional to  
 60 the imaginary part of  $\epsilon_2$  (*i.e.* optical absorption). However, the finite hBN thickness makes  $e^{i\varphi}$   
 61 complex; thus both real and imaginary part of  $\epsilon_2$  will contribute to the reflectance contrast. Eq.  
 62 S1 shows that the contribution from real part of  $\epsilon_2$  increases with light frequency. This  
 63 contribution from the real part of  $\epsilon_2$  accounts for the broad background observed in our  
 64 reflectance spectra, and it is present for both polarizations. The optical resonances, however, is  
 65 dominated by the imaginary part of  $\epsilon_2$  (*i.e.* optical absorption from phosphorene). Quantitative  
 66 evaluation of Eq. S1 shows that we can determine the optical absorption resonance energies from  
 67 the reflection peaks with an uncertainty less than 25 meV.

### 68 S3. Phenomenological tight binding model of few-layer phosphorene

69 Since the direct bandgap is at the  $\Gamma$  point in N-layer phosphorene, we only need to  
 70 consider the coupling among the N CBM (or VBM) states at the  $\Gamma$  point, with one state from  
 71 each layer. In this scheme, the N-layer phosphorene is equivalent to a finite 1D lattice (or an  
 72 linear molecule) of N identical atoms with only nearest-neighbor coupling. Assuming that, for an  
 73 isolated monolayer phosphorene, the CBM (VBM) state at the  $\Gamma$  point has an energy  $+\frac{E_{g0}}{2}(-\frac{E_{g0}}{2})$ ,  
 74 and the coupling between neighboring layers is  $\gamma^c(\gamma^v)$ , the 1D lattice will then compose of N  
 75 atoms with energy  $+\frac{E_{g0}}{2}(-\frac{E_{g0}}{2})$  and nearest neighbor hopping  $\gamma^c(\gamma^v)$ . The Hamiltonian of this  
 76 1D lattice model reads:

$$H_N = \sum_{j=1}^N \pm \frac{E_{g0}}{2} C_j^+ C_j + \left( \sum_{j=1}^{N-1} \gamma^{(s)} C_{j+1}^+ C_j + \text{h. c.} \right) \quad (\text{S2})$$

77 where  $(s) = c, v$  stands for conduction and valence band,  $C_j^+/C_j$  ( $j = 1 \dots N$ ) is the  
 78 creation/annihilation operator on  $j^{\text{th}}$  atom (*i.e.*  $j^{\text{th}}$  layer),  $C_j^+|0\rangle = |\phi_j\rangle$  is the state from  $j^{\text{th}}$   
 79 atom (*i.e.*  $j^{\text{th}}$  layer). The eigen wavefunction of the Hamiltonian can be generally written as  
 80  $|\psi\rangle = \sum_{j=1}^N a^j |\phi_j\rangle$ , which has a clear physical meaning that the eigen wavefunction  $|\psi\rangle$  of N  
 81 layer BP have contribution from each layer; and that the coefficient  $a^j$  contains full information  
 82 of how the different layers are mixed.

83 The eigenenergy and wavefunction of Eq. S2 can be solved by directly diagonalizing the  
 84 N by N tridiagonal matrix. Alternatively, here we will use a simpler and more intuitive approach,  
 85 owing to analogy to the 1D lattice. An infinite 1D lattice supports a travelling wave, with eigen  
 86 wavefunction  $a^j = e^{ikj}$  and eigenenergy  $E_k = \pm \frac{E_{g0}}{2} + 2\gamma^{(s)} \cos k$ . For a finite 1D lattice, the  
 87 two atoms at the end have only one nearest neighbor, and the boundary condition is equivalent to  
 88 having two additional fixed atoms on each end (*i.e.*  $0^{\text{th}}$  and  $(N+1)^{\text{th}}$  atoms with  $a^0 = a^{N+1} = 0$ ).  
 89 The finite 1D lattice of N+2 atoms with fixed ends can be easily solved, and the resulting n-th  
 90 eigenwavefunction and eigenenergy can be described by

$$a_{N,n}^j = \sin(k_{N,n}j), k_{N,n} = \frac{N+1-n}{N+1}\pi, n = 1 \dots N \quad (\text{S3})$$

$$E_{N,n}^{(s)} = \pm \frac{E_{g0}}{2} + 2\gamma^{(s)} \cos k_{N,n} = \pm \frac{E_{g0}}{2} - 2\gamma^{(s)} \cos\left(\frac{n}{N+1}\pi\right)$$

91 Here  $n$  indexes the conduction and valence subbands starting from the bandgap.

92 Modes with different  $n$  in Eq. S3 correspond to different orders of standing waves on the  
 93 1D lattice. Optical transitions are allowed only between two subbands with the same  $n$  for in-  
 94 plane light polarizations. The transition energy between  $n^{\text{th}}$  valence to  $n^{\text{th}}$  conduction band is  
 95 described by:

$$96 \quad E_{N,n}^R = E_{g0} - 2(\gamma^c - \gamma^v) \cos\left(\frac{n}{N+1}\pi\right) \quad (\text{S4}).$$

97 e.g.  $n = 1$  corresponds to bandgap transitions,  $n = 2$  and  $n = 3$  describes the first and second  
 98 above-bandgap resonances, respectively.

99 The model described above includes only the single lowest energy state from each layer.  
 100 This approximation becomes less accurate for higher energy subbands, which can hybridize with  
 101 other states not included in the model. Comparisons with *ab initio* calculations show that the  
 102 simple tight-binding model provides a good approximation in 1-3 layer phosphorene, as well as  
 103 low energy transitions in tetralayer phosphorene and thicker layers.

104

#### 105 **S4. Ab initio calculations**

106 We first performed density functional theory (DFT) calculations in the generalized  
 107 gradient approximation using the Quantum Espresso code<sup>3</sup>. We relaxed the geometry of one to  
 108 four layer phosphorus in a supercell arrangement using a plane wave basis with norm conserving  
 109 PBE<sup>4</sup> pseudopotentials with a van der Waals correction<sup>5,6</sup> and a 55 Ry wave function cutoff. A  
 110 large vacuum was included between repeated supercells in the aperiodic direction so that 99% of  
 111 the charge density was contained in half of each supercell.

112 The GW-Bethe-Salpeter equation (GW-BSE) calculation was done with the BerkeleyGW  
 113 code<sup>7-9</sup>. We performed a one-shot GW calculation to obtain the quasiparticle (QP) bandstructure.  
 114 The dynamical screening effects were accounted for with the Hybertsen-Louie generalized  
 115 plasmon pole (HL-GPP) model<sup>8</sup>. We used a  $14 \times 10 \times 1$   $k$ -grid to sample the Brillouin zone,  
 116 included plane-wave components up to a cutoff of 15 Ry in the dielectric matrix, and included  
 117 unoccupied states with energy up to 10 Ry to converge the QP energies to better than 0.1 eV.  
 118 The static remainder technique was used to speed up convergence with respect to unoccupied  
 119 states<sup>10</sup>. A truncated Coulomb interaction was used to prevent spurious interactions between  
 120 periodic images<sup>11</sup>. We solved the BSE on an  $80 \times 96 \times 1$   $k$ -grid, which converges the excitation  
 121 energies to better than 0.1 eV, and included valence and conduction bands involved in transitions  
 122 up to 3 eV.

123 To include the effect of the encapsulation, we first explicitly relaxed the distance between  
 124 black phosphorene and 25 Å of sapphire and 25 Å of hexagonal boron nitride at the DFT level to

125 determine the distance between the substrate and the black phosphorus. We then included the  
126 effect of screening from the sapphire substrate and boron nitride capping layer on the self-energy  
127 and the electron-hole interaction following the method in Refs. 12,13.

128

129

## 130 **References**

131 1. Wang, F. *et al.* Gate-Variable Optical Transitions in Graphene. *Science* **320**, 206–209 (2008).

132 2. Mak, K. F. *et al.* Measurement of the Optical Conductivity of Graphene. *Phys. Rev. Lett.* **101**,  
133 196405 (2008).

134 3. Giannozzi, P. *et al.* QUANTUM ESPRESSO: a modular and open-source software project  
135 for quantum simulations of materials. *J. Phys. Condens. Matter* **21**, 395502 (2009).

136 4. Perdew, J. P., Burke, K. & Ernzerhof, M. Generalized Gradient Approximation Made Simple.  
137 *Phys. Rev. Lett.* **77**, 3865–3868 (1996).

138 5. Grimme, S. Semiempirical GGA-type density functional constructed with a long-range  
139 dispersion correction. *J. Comput. Chem.* **27**, 1787–1799 (2006).

140 6. Barone, V. *et al.* Role and effective treatment of dispersive forces in materials: Polyethylene  
141 and graphite crystals as test cases. *J. Comput. Chem.* **30**, 934–939 (2009).

142 7. Deslippe, J. *et al.* BerkeleyGW: A massively parallel computer package for the calculation of  
143 the quasiparticle and optical properties of materials and nanostructures. *Comput. Phys.*  
144 *Commun.* **183**, 1269–1289 (2012).

145 8. Hybertsen, M. S. & Louie, S. G. Electron correlation in semiconductors and insulators: Band  
146 gaps and quasiparticle energies. *Phys. Rev. B* **34**, 5390–5413 (1986).

147 9. Rohlfing, M. & Louie, S. G. Electron-hole excitations and optical spectra from first  
148 principles. *Phys. Rev. B* **62**, 4927–4944 (2000).

- 149 10. Deslippe, J., Samsonidze, G., Jain, M., Cohen, M. L. & Louie, S. G. Coulomb-hole  
150 summations and energies for \$GW\$ calculations with limited number of empty orbitals: A  
151 modified static remainder approach. *Phys. Rev. B* **87**, 165124 (2013).
- 152 11. Ismail-Beigi, S. Truncation of periodic image interactions for confined systems. *Phys. Rev. B*  
153 **73**, 233103 (2006).
- 154 12. Ugeda, M. M. *et al.* Giant bandgap renormalization and excitonic effects in a monolayer  
155 transition metal dichalcogenide semiconductor. *Nat. Mater.* **13**, 1091–1095 (2014).
- 156 13. Bradley, A. J. *et al.* Probing the Role of Interlayer Coupling and Coulomb Interactions on  
157 Electronic Structure in Few-Layer MoSe<sub>2</sub> Nanostructures. *Nano Lett.* **15**, 2594–2599 (2015).
- 158
